# Supplementary material for: Repeated Measures of Modified Rankin Scale Scores to Assess Functional Recovery From Stroke: AFFINITY Study Findings
Source: PubMed Central journal article supplement — J Am Heart Assoc. 2022 Aug 5;11(16):e025425. doi: 10.1161/JAHA.121.025425 (PMC9496315; doi:10.1161/jaha.121.025425), 2022-08-05
Supplement: JAH3-11-e025425-s001.pdf [file JAH3-11-e025425-s001.pdf]

# **SUPPLEMENTAL MATERIAL**

**Table S1. Patterns of follow up change in mRS between Day 1, 28, 90, 180 and 365 for haemorrhagic stroke.**

| Change from previous period | Day 1<br>(n=185) | Day 28<br>(n=181) | Day 90<br>(n=178) | Day 180<br>(n=179) | Day 365<br>(n=179) |
|-----------------------------|------------------|-------------------|-------------------|--------------------|--------------------|
| Worsening, n (%)            | -                | 2 (1%)            | 3 (2%)            | 9 (5%)             | 11 (6%)            |
| No change, n (%)            | -                | 60 (33%)          | 90 (51%)          | 110 (61%)          | 134 (75%)          |
| Improving, n (%)            | -                | 119 (66%)         | 85 (48%)          | 60 (34%)           | 34 (19%)           |
| Incremental deaths, n (%)   |                  | 2 (1%)            | 3 (2%)            | 2 (1%)             | 2 (1%)             |
| mRS, mean (SD)              | 3.8 (0.1)        | 2.9 (0.1)         | 2.4 (0.1)         | 2 (0.1)            | 1.9 (0.1)          |
| mRS, median (IQR)           | 4 (0)            | 3 (2)             | 2 (2)             | 2 (2)              | 1 (2)              |
| mRS change, mean (SD)       | -                | - 0.9 (0.9)       | - 0.6 (0.9)       | - 0.4 (0.8)        | - 0.1 (0.6)        |

Worsening, No change and Improving refer to the difference between the participant's mRS score at one assessment compared to the previous. For example, at Day 90, 3 (2%) individuals had a worse mRS score than at Day 28.

**Table S2. Patterns of follow up change in mRS between Day 1, 28, 90, 180 and 365 for ischemic stroke.**

|                           | Day 1<br>(n=1091) | Day 28<br>(n=1082) | Day 90<br>(n=1075) | Day 180<br>(n=1070) | Day 365<br>(n=1067) |
|---------------------------|-------------------|--------------------|--------------------|---------------------|---------------------|
| Worsening, n (%)          | -                 | 22 (2%)            | 31 (3%)            | 35 (3%)             | 55 (5%)             |
| No change, n (%)          | -                 | 476 (44%)          | 586 (55%)          | 743 (69%)           | 868 (81%)           |
| Improving, n (%)          | -                 | 584 (54%)          | 458 (43%)          | 292 (27%)           | 144 (13%)           |
| Incremental deaths, n (%) |                   | 7 (1%)             | 9 (1%)             | 5 (0%)              | 16 (1%)             |
| mRS, mean (SD)            | 3.3 (0.0)         | 2.5 (0.0)          | 2.0 (0.0)          | 1.7 (0.0)           | 1.7 (0.0)           |
| mRS, median (IQR)         | 4 (2)             | 3 (2)              | 2 (2)              | 2 (2)               | 1 (2)               |
| mRS change, mean (SD)     | -                 | - 0.7 (0.9)        | - 0.5 (0.7)        | - 0.3 (0.6)         | - 0.1 (0.6)         |

Worsening, No change and Improving refer to the difference between the participant's mRS score at one assessment compared to the previous. For example, at Day 90, 31 (3%) individuals had a worse mRS score than at Day 28.

**Figure S1. Modified CONSORT Flow Diagram for the AFFINITY trial secondary post-hoc cohort level analysis.**

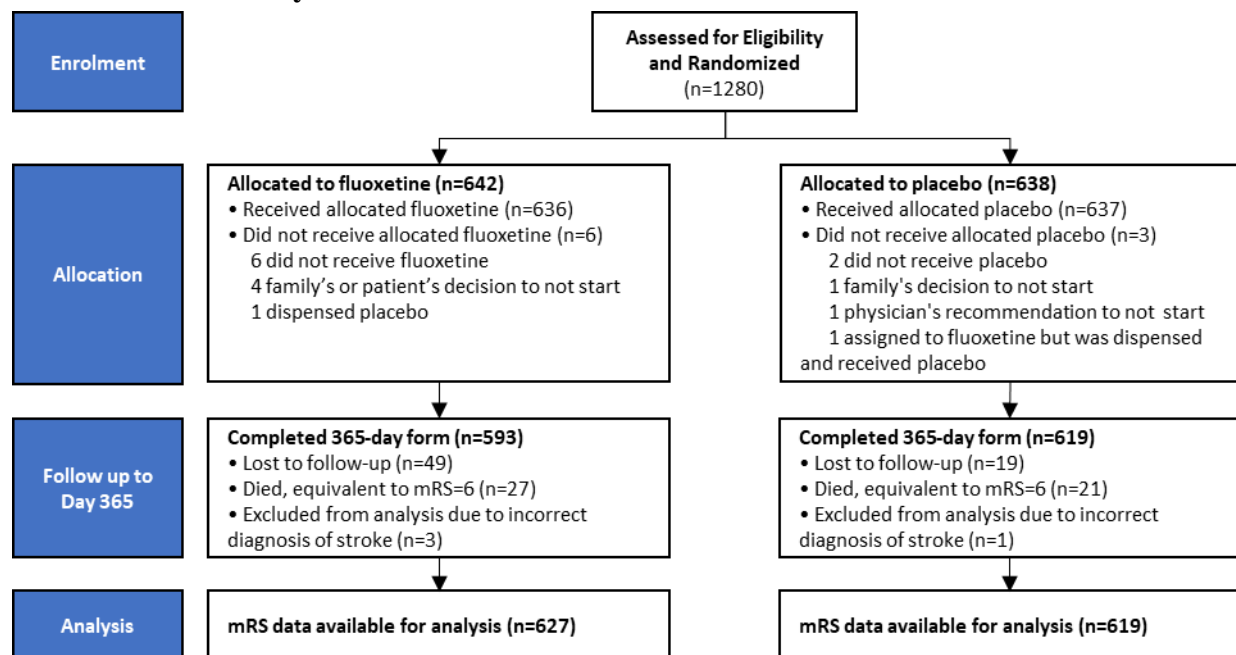

**Figure S2. Sankey diagram of the mRS score over 1 year for AFFINITY study participants.**

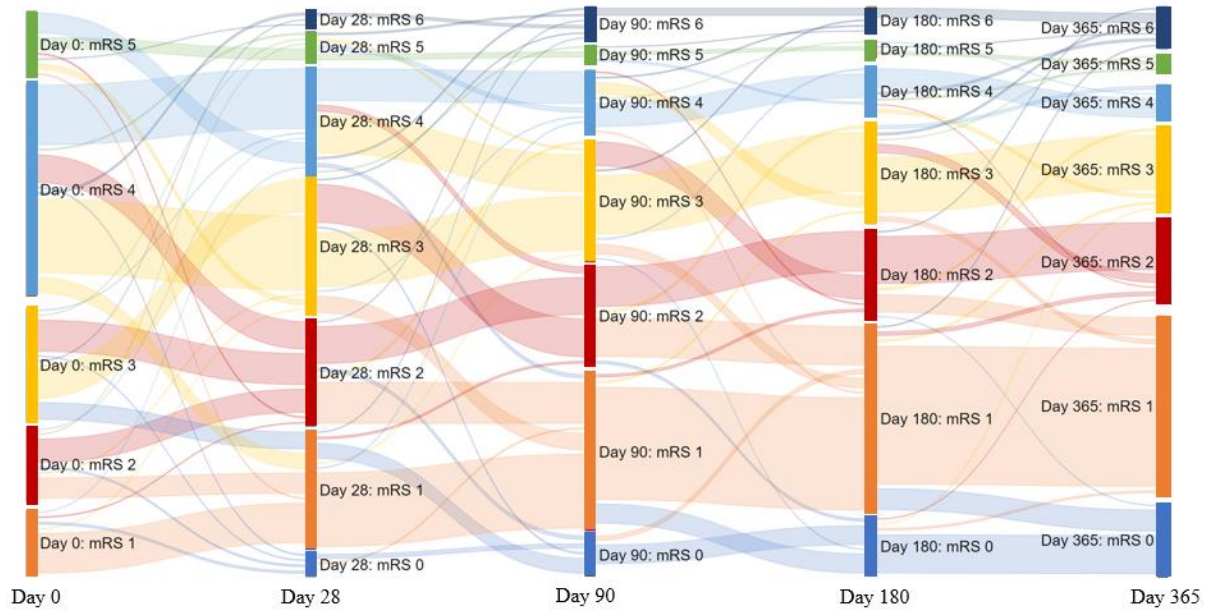

**Figure S3 Directed Acyclic Graph for the AFFINITY trial secondary post-hoc cohort level analysis.**

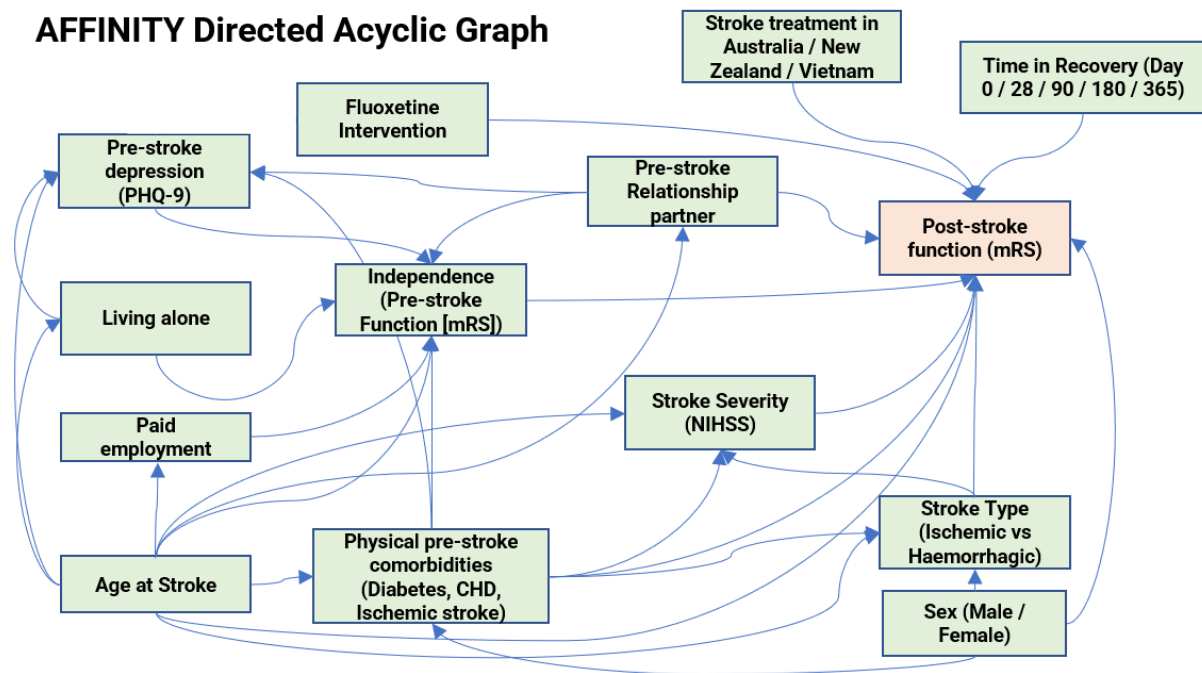

Arrows leading from one variable to another indicate the likely mediating effect of that variable.

Age at stroke and sex were deemed to be the only truly exogenous confounders for the explanatory variables; and were the only covariates used in adjusted regression.

Age at stroke, sex, fluoxetine intervention, country of treatment, and time since stroke were deemed to be exogenous variables not requiring adjustment.

## Strengthening the Reporting of Observational Studies in Epidemiology (STROBE)

### Guidelines Checklist

|                        |                     | Reporting Item                                                                                                                  | Page Number |
|------------------------|---------------------|---------------------------------------------------------------------------------------------------------------------------------|-------------|
| Title and abstract     |                     |                                                                                                                                 |             |
| Title                  | <a href="#">#1a</a> | Indicate the study's design with a commonly used term in the title or the abstract                                              | 5           |
| Abstract               | <a href="#">#1b</a> | Provide in the abstract an informative and balanced summary of what was done and what was found                                 | 5           |
| Introduction           |                     |                                                                                                                                 |             |
| Background / rationale | <a href="#">#2</a>  | Explain the scientific background and rationale for the investigation being reported                                            | 8-10        |
| Objectives             | <a href="#">#3</a>  | State specific objectives, including any prespecified hypotheses                                                                | 10          |
| Methods                |                     |                                                                                                                                 |             |
| Study design           | <a href="#">#4</a>  | Present key elements of study design early in the paper                                                                         | 11-12       |
| Setting                | <a href="#">#5</a>  | Describe the setting, locations, and relevant dates, including periods of recruitment, exposure, follow-up, and data collection | 11          |

|                            |                     |                                                                                                                                                                                                                                                                      |                                                   |
|----------------------------|---------------------|----------------------------------------------------------------------------------------------------------------------------------------------------------------------------------------------------------------------------------------------------------------------|---------------------------------------------------|
| Eligibility criteria       | <a href="#">#6a</a> | Give the eligibility criteria, and the sources and methods of selection of participants. Describe methods of follow-up.                                                                                                                                              | 11                                                |
| Eligibility criteria       | <a href="#">#6b</a> | For matched studies, give matching criteria and number of exposed and unexposed                                                                                                                                                                                      | N/a – not matched                                 |
| Variables                  | <a href="#">#7</a>  | Clearly define all outcomes, exposures, predictors, potential confounders, and effect modifiers. Give diagnostic criteria, if applicable                                                                                                                             | 11-13                                             |
| Data sources / measurement | <a href="#">#8</a>  | For each variable of interest give sources of data and details of methods of assessment (measurement). Describe comparability of assessment methods if there is more than one group. Give information separately for for exposed and unexposed groups if applicable. | n/a – referenced original AFFINITY trial methods. |
| Bias                       | <a href="#">#9</a>  | Describe any efforts to address potential sources of bias                                                                                                                                                                                                            | 11-13                                             |
| Study size                 | <a href="#">#10</a> | Explain how the study size was arrived at                                                                                                                                                                                                                            | 11-12                                             |
| Quantitative variables     | <a href="#">#11</a> | Explain how quantitative variables were handled in the analyses. If applicable, describe which groupings were chosen, and why                                                                                                                                        | 11-13                                             |



|                     |                      |                                                                                                                                                                                                                                                                            |                                                                                                 |
|---------------------|----------------------|----------------------------------------------------------------------------------------------------------------------------------------------------------------------------------------------------------------------------------------------------------------------------|-------------------------------------------------------------------------------------------------|
| Statistical methods | <a href="#">#12a</a> | Describe all statistical methods, including those used to control for confounding                                                                                                                                                                                          | 11-13                                                                                           |
| Statistical methods | <a href="#">#12b</a> | Describe any methods used to examine subgroups and interactions                                                                                                                                                                                                            | n/a                                                                                             |
| Statistical methods | <a href="#">#12c</a> | Explain how missing data were addressed                                                                                                                                                                                                                                    | 12                                                                                              |
| Statistical methods | <a href="#">#12d</a> | If applicable, explain how loss to follow-up was addressed                                                                                                                                                                                                                 | 12                                                                                              |
| Statistical methods | <a href="#">#12e</a> | Describe any sensitivity analyses                                                                                                                                                                                                                                          | 11-13<br>comparison of cross sectional and repeated measures                                    |
| Results             |                      |                                                                                                                                                                                                                                                                            |                                                                                                 |
| Participants        | <a href="#">#13a</a> | Report numbers of individuals at each stage of study—eg numbers potentially eligible, examined for eligibility, confirmed eligible, included in the study, completing follow-up, and analysed. Give information separately for exposed and unexposed groups if applicable. | Full data in tables and Figure 1, Figure S1 and Figure S2. Refer to original AFFINITY study for |

|                  |                      |                                                                                                                                                                                                                   |                                        |
|------------------|----------------------|-------------------------------------------------------------------------------------------------------------------------------------------------------------------------------------------------------------------|----------------------------------------|
|                  |                      |                                                                                                                                                                                                                   | original trial enrolment numbers.      |
| Participants     | <a href="#">#13b</a> | Give reasons for non-participation at each stage                                                                                                                                                                  | n/a – refer to original AFFINITY trial |
| Participants     | <a href="#">#13c</a> | Consider use of a flow diagram                                                                                                                                                                                    | n/a – refer to original AFFINITY trial |
| Descriptive data | <a href="#">#14a</a> | Give characteristics of study participants (eg demographic, clinical, social) and information on exposures and potential confounders. Give information separately for exposed and unexposed groups if applicable. | Table 1                                |
| Descriptive data | <a href="#">#14b</a> | Indicate number of participants with missing data for each variable of interest                                                                                                                                   | 12                                     |
| Descriptive data | <a href="#">#14c</a> | Summarise follow-up time (eg, average and total amount)                                                                                                                                                           | 11-13                                  |
| Outcome data     | <a href="#">#15</a>  | Report numbers of outcome events or summary measures over time. Give information                                                                                                                                  | Table 1, Table 2                       |

|                |                      |                                                                                                                                                                                                          |                                    |
|----------------|----------------------|----------------------------------------------------------------------------------------------------------------------------------------------------------------------------------------------------------|------------------------------------|
|                |                      | separately for exposed and unexposed groups if applicable.                                                                                                                                               |                                    |
| Main results   | <a href="#">#16a</a> | Give unadjusted estimates and, if applicable, confounder-adjusted estimates and their precision (eg, 95% confidence interval). Make clear which confounders were adjusted for and why they were included | 11-13<br><br>Table 3               |
| Main results   | <a href="#">#16b</a> | Report category boundaries when continuous variables were categorized                                                                                                                                    | Table 3, logit categories provided |
| Main results   | <a href="#">#16c</a> | If relevant, consider translating estimates of relative risk into absolute risk for a meaningful time period                                                                                             | n/a – risk estimates not provided  |
| Other analyses | <a href="#">#17</a>  | Report other analyses done—eg analyses of subgroups and interactions, and sensitivity analyses                                                                                                           | 11-13<br><br>Table S1,<br>Table S2 |
| Discussion     |                      |                                                                                                                                                                                                          |                                    |
| Key results    | <a href="#">#18</a>  | Summarise key results with reference to study objectives                                                                                                                                                 | 13-17                              |
| Limitations    | <a href="#">#19</a>  | Discuss limitations of the study, taking into account sources of potential bias or                                                                                                                       | 18                                 |

|                   |                     |                                                                                                                                                                  |       |
|-------------------|---------------------|------------------------------------------------------------------------------------------------------------------------------------------------------------------|-------|
|                   |                     | imprecision. Discuss both direction and magnitude of any potential bias.                                                                                         |       |
| Interpretation    | <a href="#">#20</a> | Give a cautious overall interpretation considering objectives, limitations, multiplicity of analyses, results from similar studies, and other relevant evidence. | 13-18 |
| Generalisability  | <a href="#">#21</a> | Discuss the generalisability (external validity) of the study results                                                                                            | 13-18 |
| Other Information |                     |                                                                                                                                                                  |       |
| Funding           | <a href="#">#22</a> | Give the source of funding and the role of the funders for the present study and, if applicable, for the original study on which the present article is based    | 19    |
